# Supplementary material for: A facile method for transparent carbon nanosheets heater based on polyimide
Source: Royal Society of Chemistry journal article supplement (doi:10.1039/c6ra07457j), 2016-01-01
Supplement: c6ra07457j1.pdf [file c6ra07457j1.pdf]

## Supporting Information

# **A facile method for transparent carbon nanosheets heater based on polyimide**

Hamid Sourì <sup>a,†</sup>, Seong Jun Yu <sup>b,†</sup>, Hyeonuk Yeo <sup>a</sup>, Munju Goh <sup>a</sup>, Jun-Yeon Hwang <sup>a</sup>, Seung Min Kim <sup>a</sup>, Bon-Cheol Ku <sup>a</sup>, Young Gyu Jeong <sup>b,\*</sup>, and Nam-Ho You <sup>a,\*</sup>

<sup>a</sup> Carbon Convergence Materials Research Center, Institute of Advanced Composites Materials, Korea Institute of Science and Technology, Eunha-ri san 101, Bondong-eup, Wanju-gun, Jeollabuk-do, 565-905, Korea

<sup>b</sup> Department of Advanced Organic Materials and Textile System Engineering, Chungnam National University, Daejeon 34234, Korea

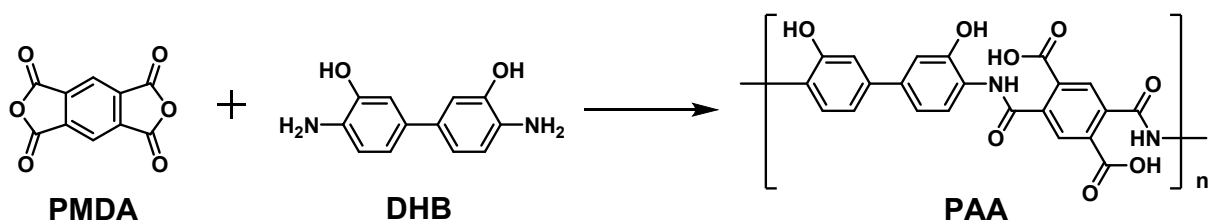

**Scheme S1.** Schematic illustration of the poly(amic acid) structure as a CNS precursor

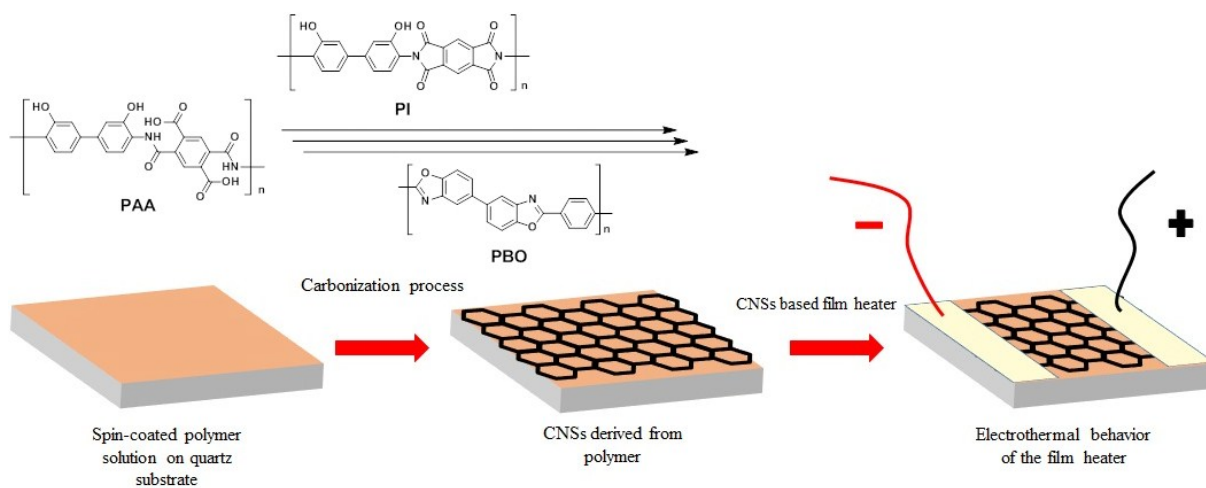

**Scheme S2.** Schematic illustration of the transfer-free process of the CNS using polymer and its use as transparent film heater

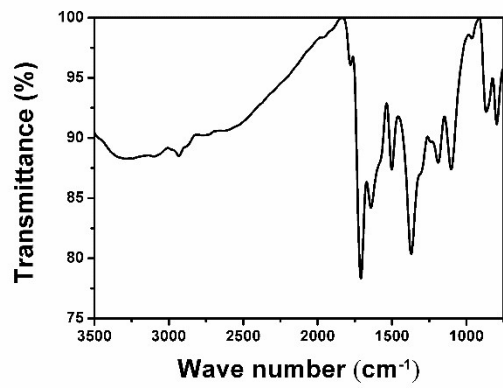

**Figure S1.** FT-IR spectra of precursor PAA film.

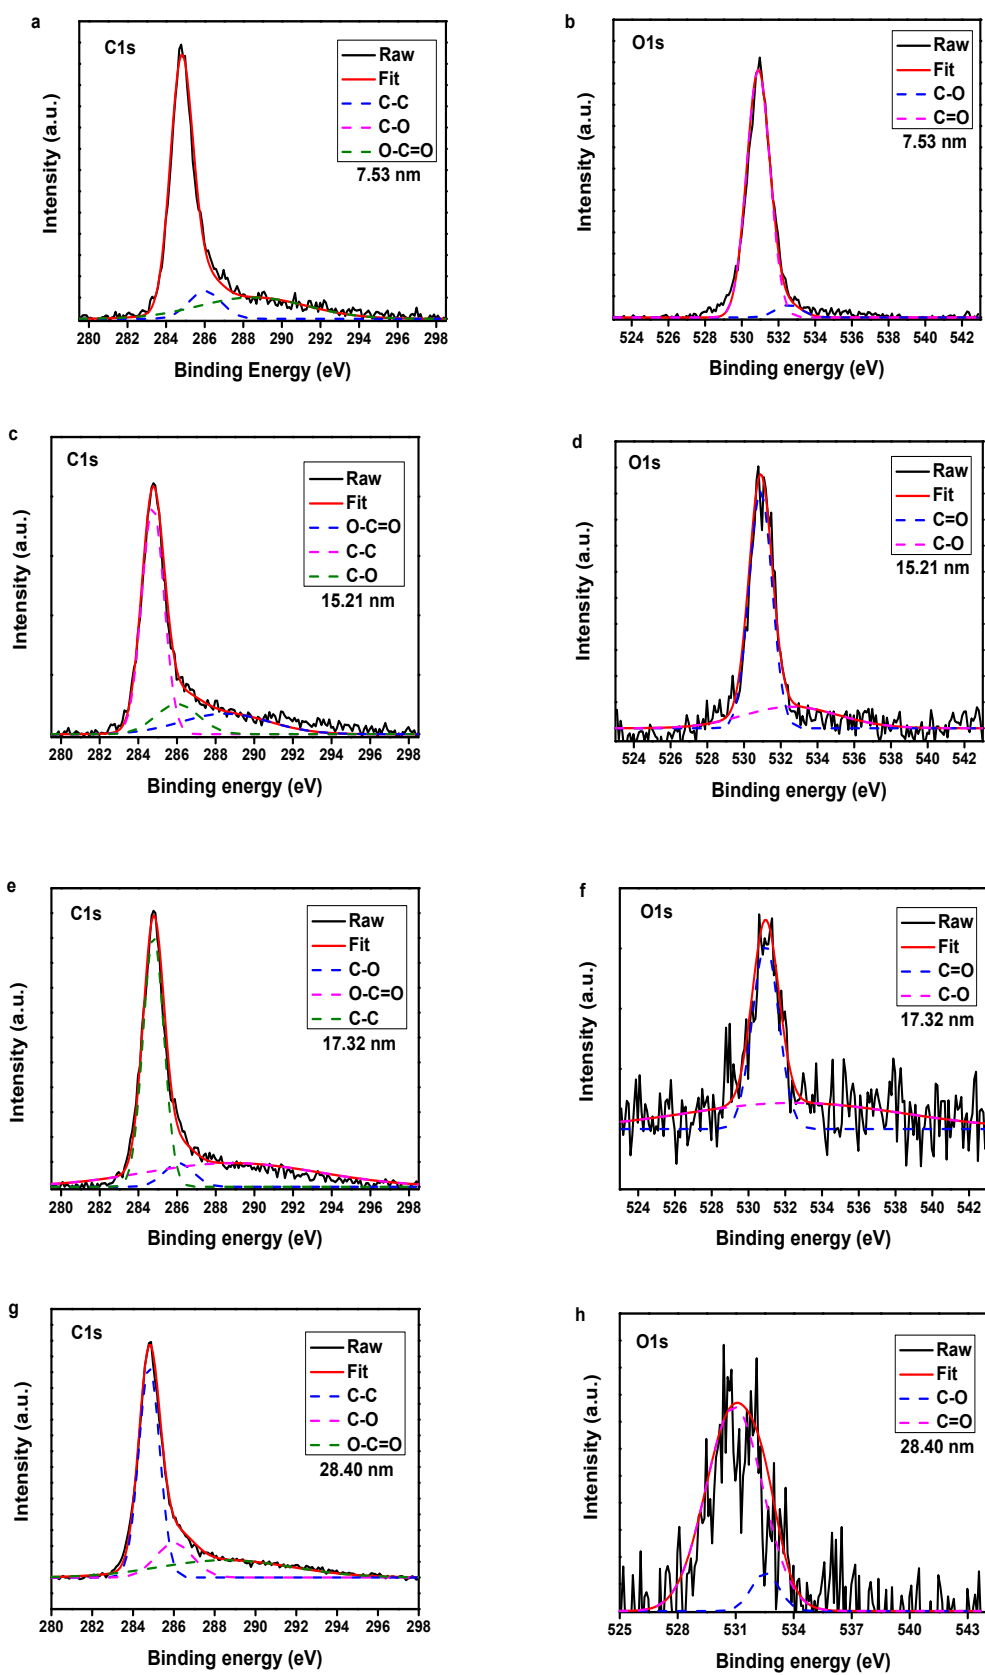

**Figure S2.** (a, c, e, g) The deconvoluted XPS C1s and (b, d, f, h) O1s spectrum of the CNS films derived from various polymer solutions.

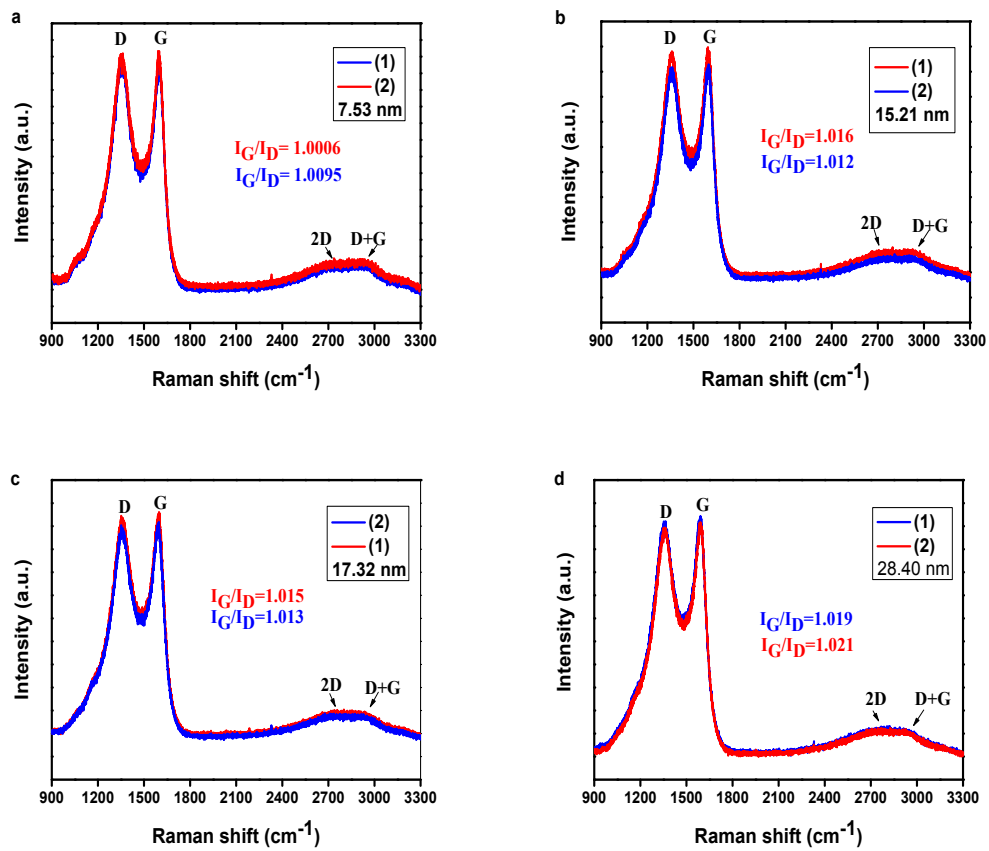

**Figure S3.** Two representative Raman spectra of CNS films with different thicknesses of 7.53-28.40 nm.

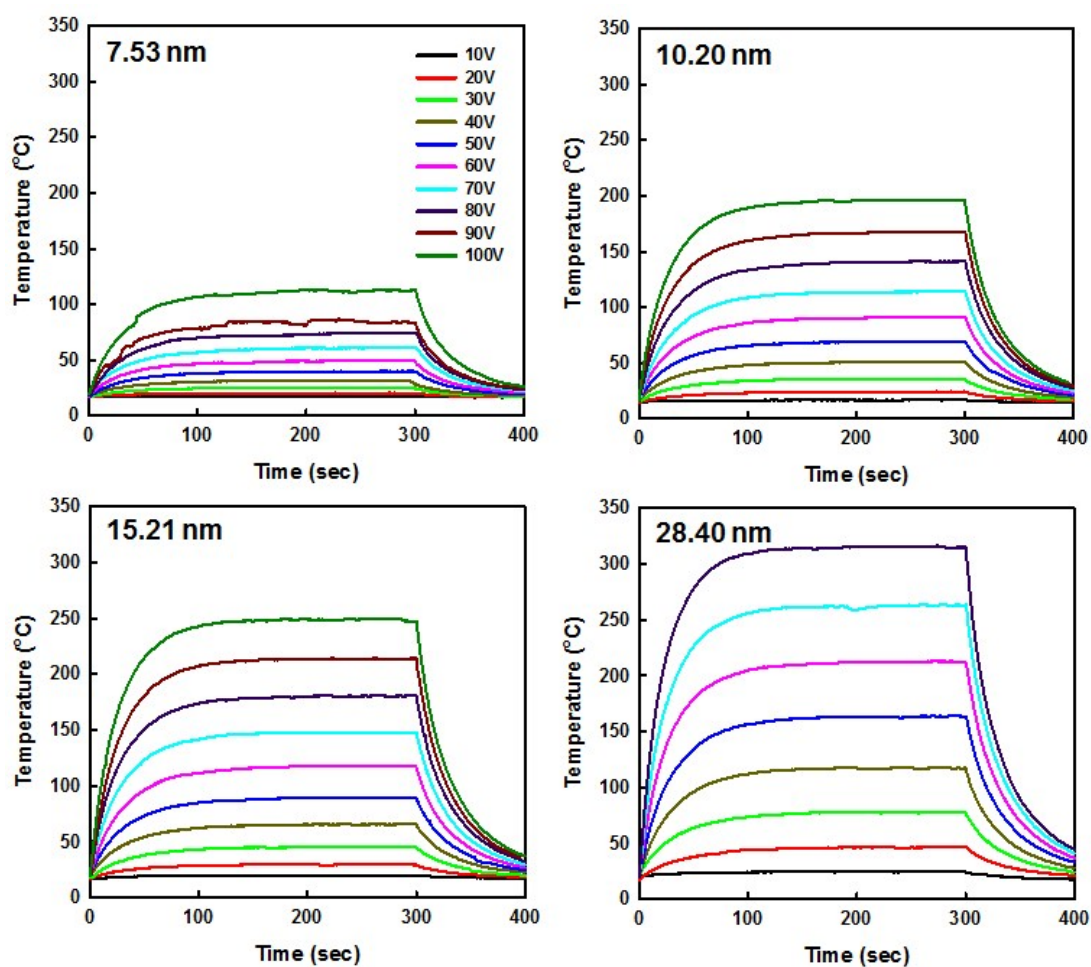

**Figure S4.** Time-dependent temperature changes of the CNS films with different thicknesses under a variety of applied voltages of 10-100 V.
